# Supplementary material for: Controlling excited-state prototropism via the acidity of ionic liquids
Source: Royal Society of Chemistry journal article supplement (doi:10.1039/c3ra41176a), 2013-01-01
Supplement: c3ra41176a.pdf [file c3ra41176a.pdf]

## ELECTRONIC SUPPLEMENTARY INFORMATION (ESI)

### **Controlling excited-state prototropism via acidity of ionic liquid**

Vinod Kumar, Rewa Rai and Siddharth Pandey\*

*Department of Chemistry, Indian Institute of Technology Delhi, Hauz Khas, New  
Delhi – 110016, India.*

Corresponding author: E-mail: [sipandey@chemistry.iitd.ac.in](mailto:sipandey@chemistry.iitd.ac.in)

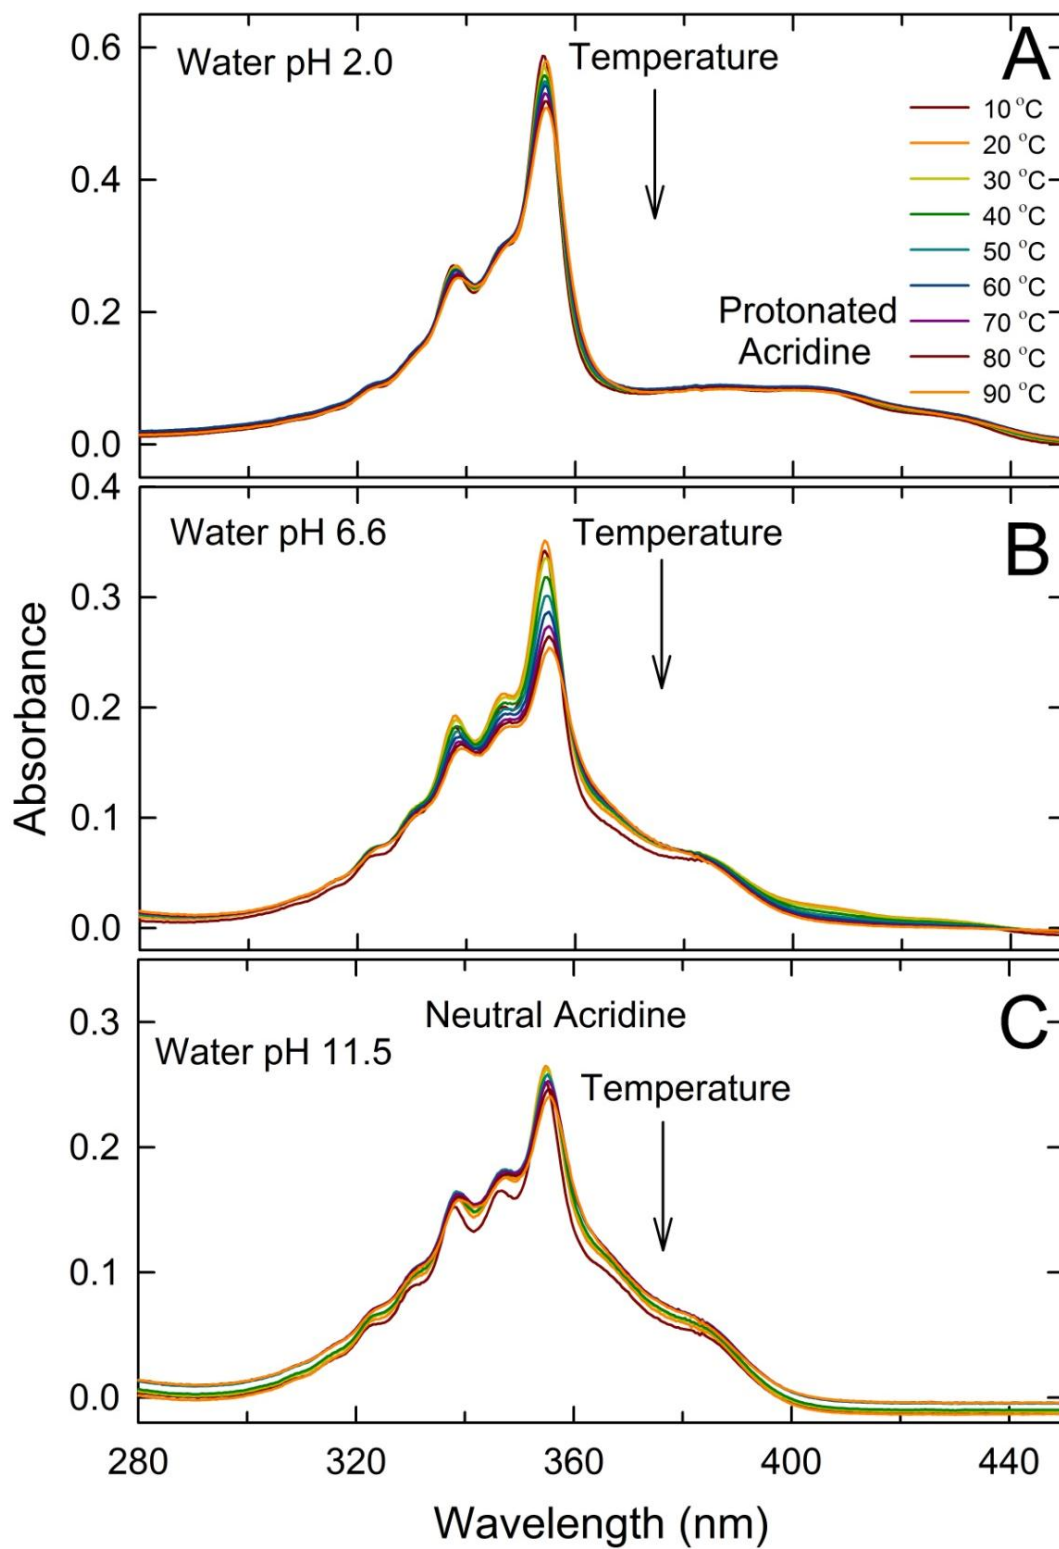

**Figure S1.** Effect of temperature on electronic absorbance spectra of acridine (25  $\mu\text{M}$ ) dissolved in different pH water.

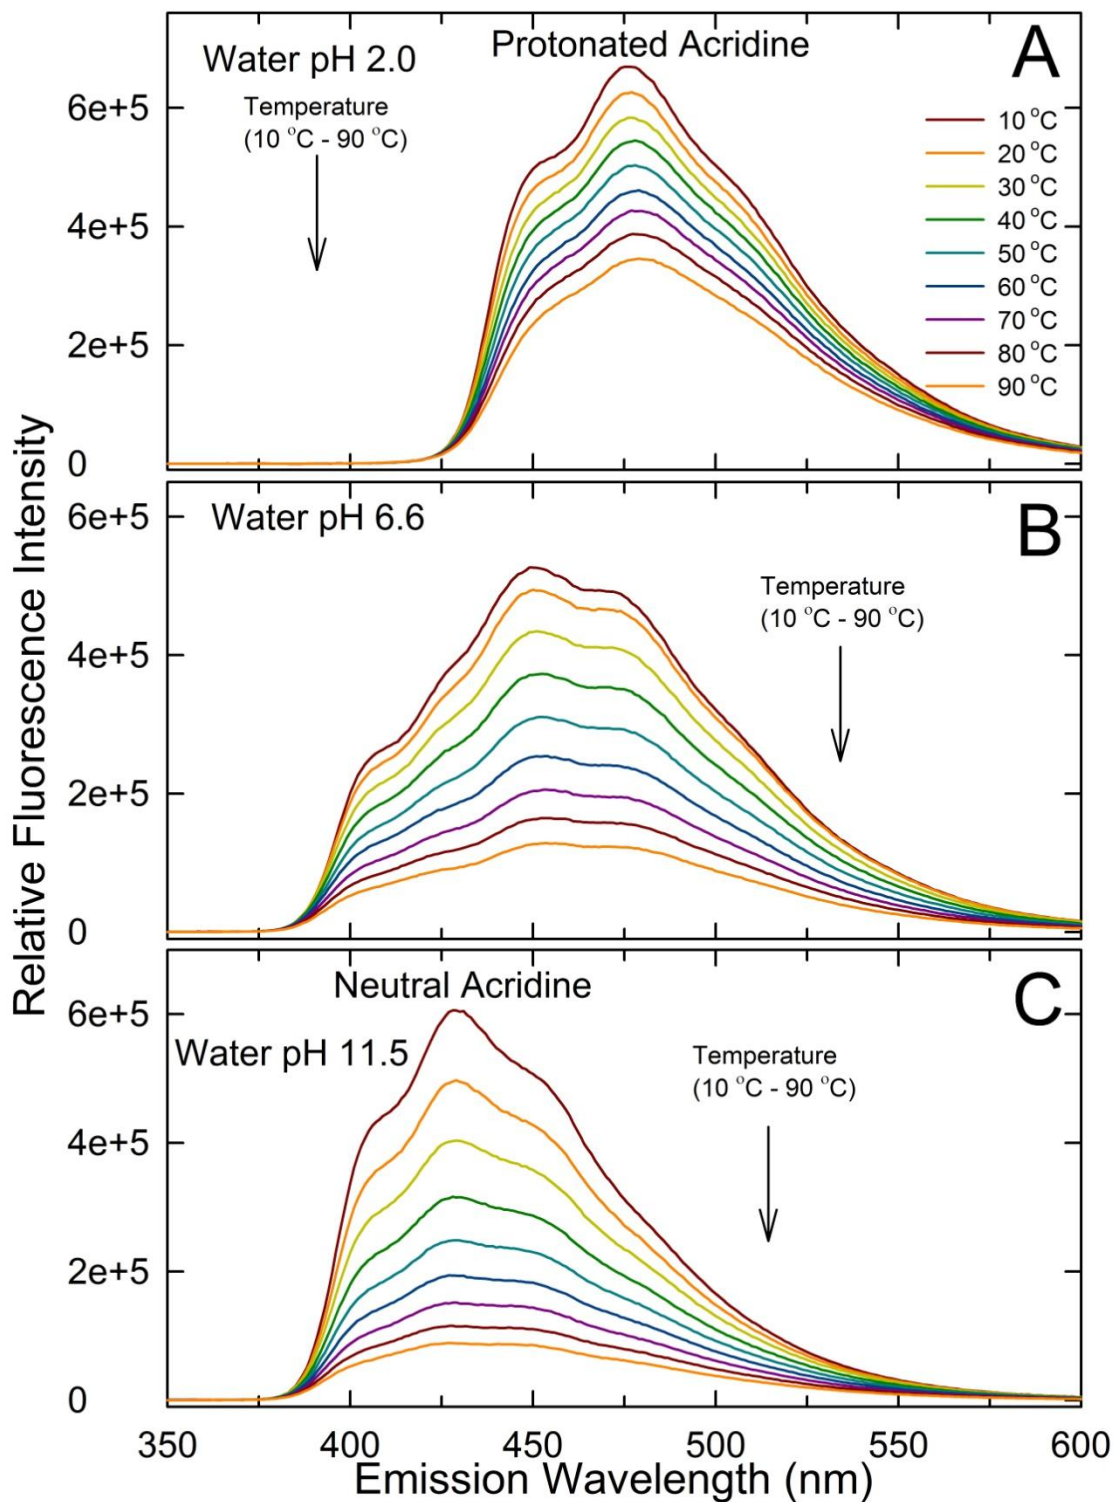

**Figure S2.** Effect of temperature on the fluorescence emission spectra of acridine (25  $\mu\text{M}$ ) dissolved in different pH water.

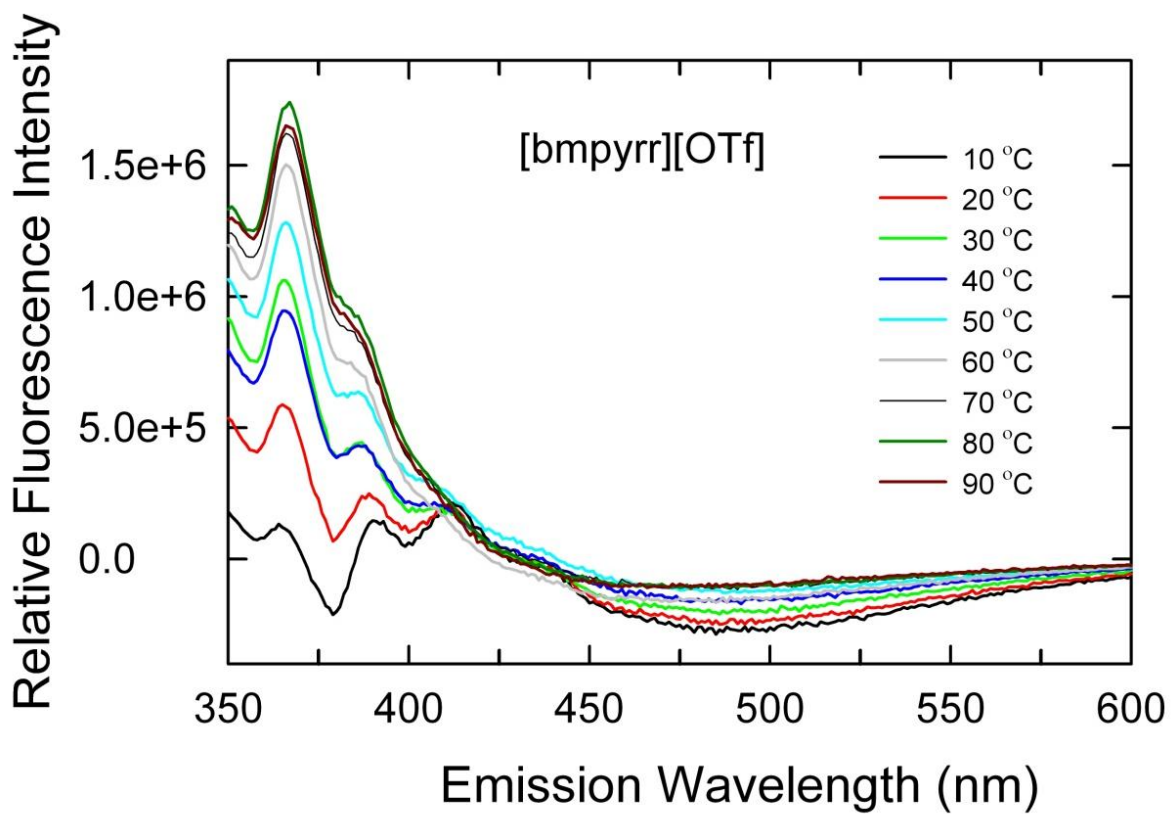

**Figure S3.** Effect of temperature on fluorescence emission spectra of acridine (25 μM,  $\lambda_{\text{ex}} = 340$  nm) dissolved in [bmpyrr][OTf].

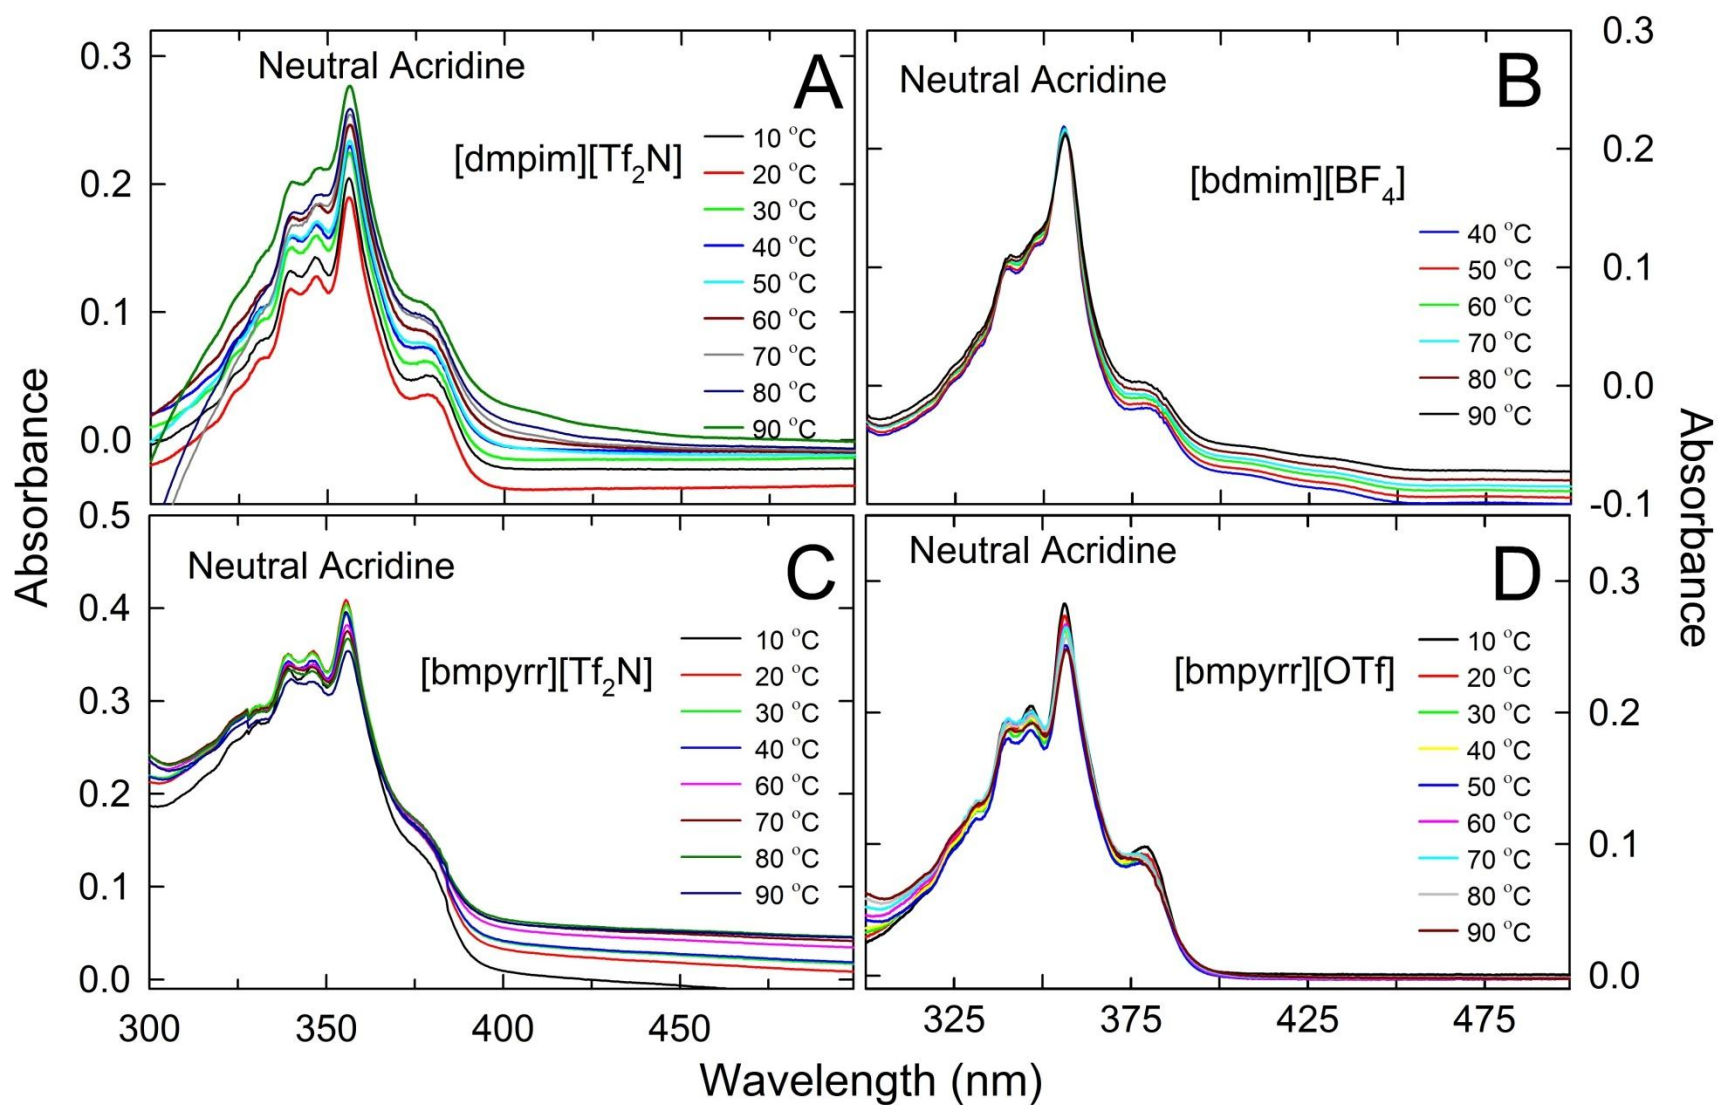

**Figure S4.** Effect of temperature on absorbance spectra of acridine (25  $\mu\text{M}$ ) dissolved in different ILs.

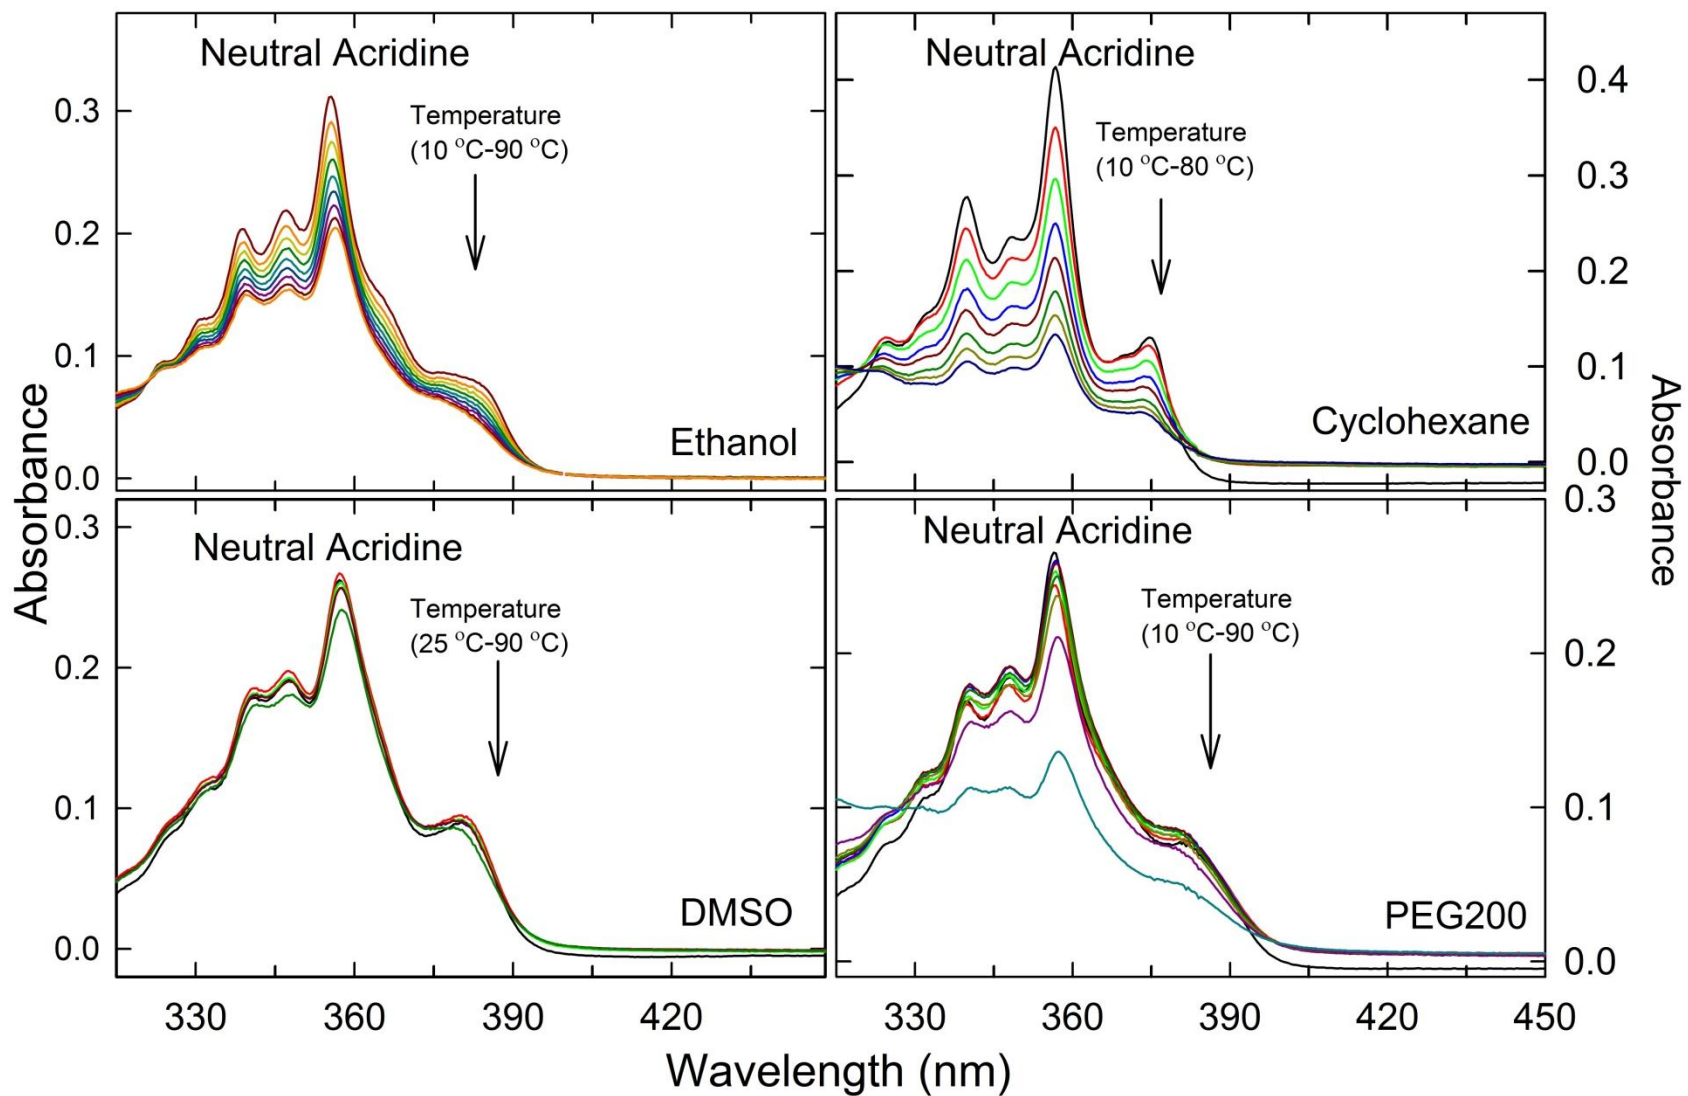

**Figure S5.** Effect of temperature on absorbance spectra of acridine (25  $\mu\text{M}$ ) dissolved in different solvents.

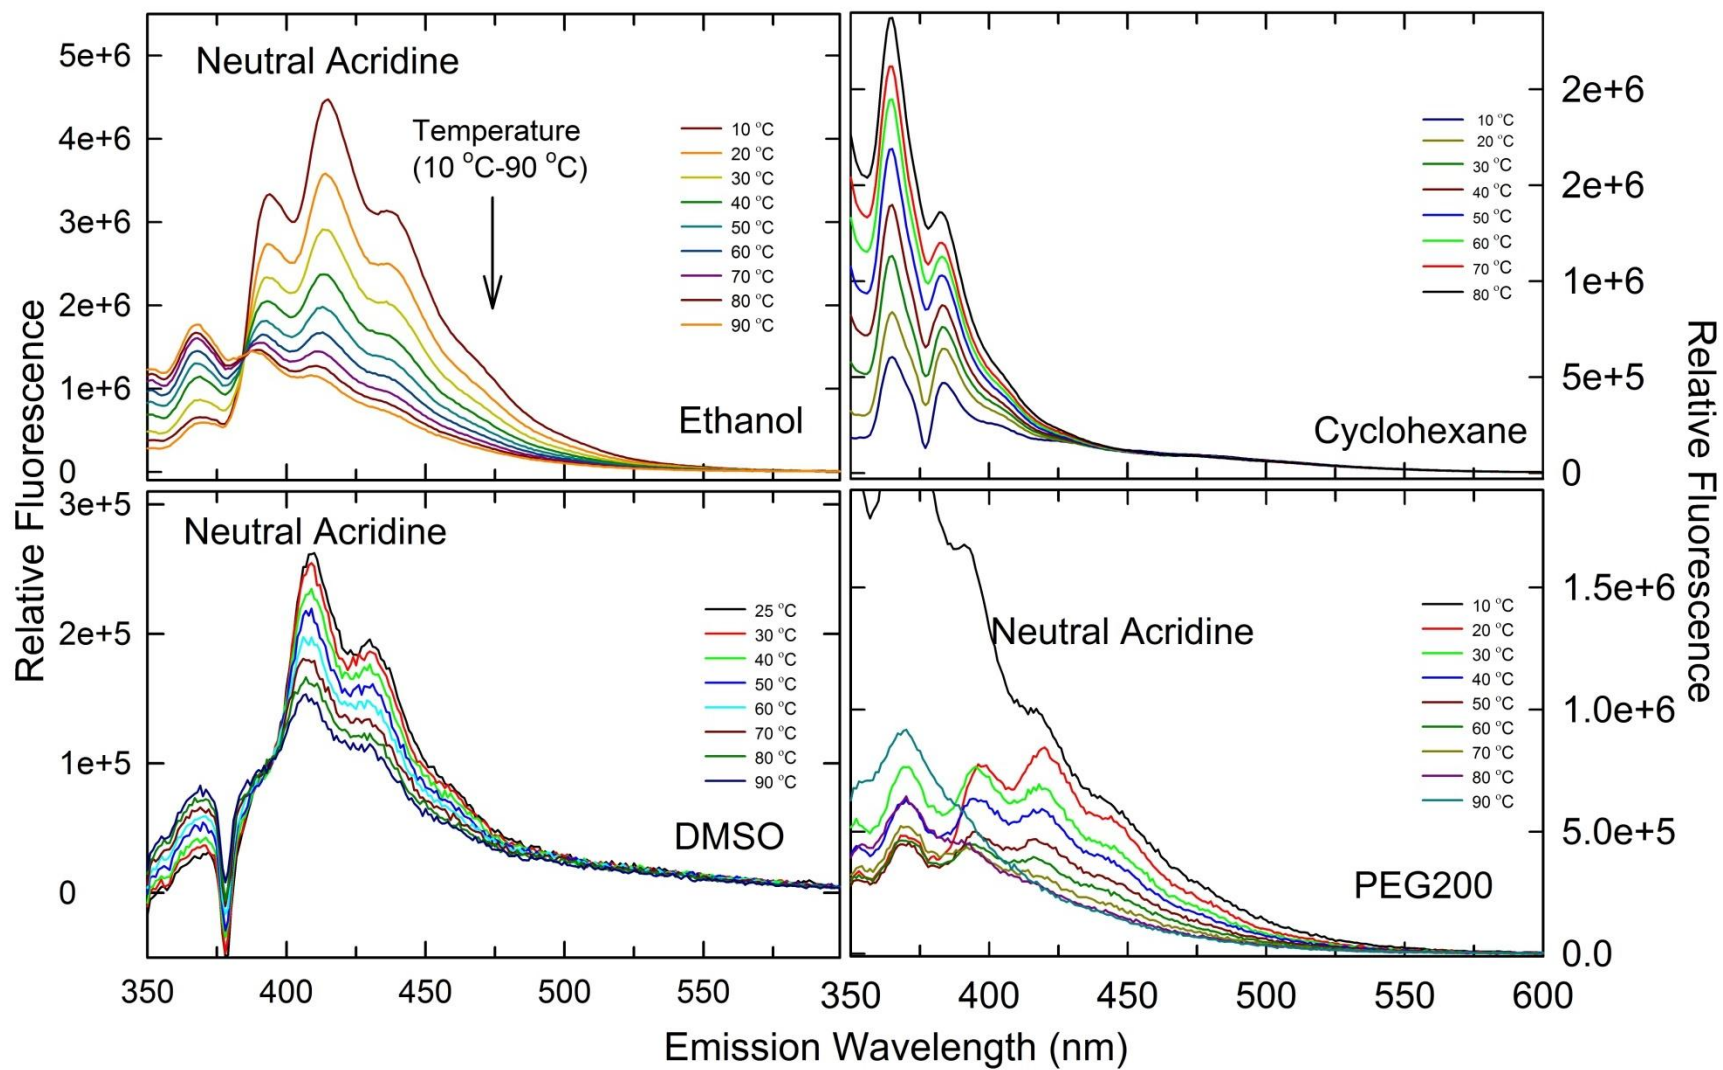

**Figure S6.** Effect of temperature on fluorescence emission spectra of acridine (25  $\mu\text{M}$ ) dissolved in different solvents.
